# Supplementary material
Source: Royal Society of Chemistry journal article supplement (doi:10.1039/d6ta04002k)
Supplement: d6ta04002k1.pdf [file d6ta04002k1.pdf]

## Supporting Information (SI)

### **Planar [5,5] Fused-ring Framework in Perovskite Energetic Materials: A One-pot Assembly Toward High-Energy-Density Materials**

*Caijin lei<sup>a+</sup>, Chao Wang<sup>a+</sup>, Jie Tang<sup>a</sup>, Wei Hu<sup>a</sup>, Guangbin Cheng<sup>\*a</sup>, Chuan Xiao<sup>\*b</sup>, and Hongwei Yang<sup>\*a</sup>*

a. School of Chemical Engineering, Nanjing University of Science and Technology Nanjing 210094, China.

E-mail: [hyang@mail.njust.edu.cn](mailto:hyang@mail.njust.edu.cn); [gcheng@mail.njust.edu.cn](mailto:gcheng@mail.njust.edu.cn)

b. China Northern Industries Group Co., Ltd (NORINCO GROUP), Beijing 100089, P. R.China. E-mail:

[47785121@qq.com](mailto:47785121@qq.com)

a+. These authors contributed equally

## Contents

|                                                                         |           |
|-------------------------------------------------------------------------|-----------|
| <b>1. General Methods .....</b>                                         | <b>3</b>  |
| <b>2. The Experiment and Crystallographic Data .....</b>                | <b>3</b>  |
| <b>3. Theoretical Study .....</b>                                       | <b>8</b>  |
| <b>4. References .....</b>                                              | <b>9</b>  |
| <b>5. <sup>1</sup>H NMR and <sup>13</sup>C NMR Spectra of BPP .....</b> | <b>9</b>  |
| <b>6. The IR Spectras of BPP .....</b>                                  | <b>11</b> |
| <b>7. The DSC of BPP .....</b>                                          | <b>12</b> |

## 1. General Methods

$^1\text{H}$  and  $^{13}\text{C}$  NMR spectra were recorded on 300 MHz (Bruker AVANCE 300) clear magnetic resonance spectrometers operating at 300 and 75 MHz, respectively, by using  $\text{DMSO-}d_6$  as the solvent and locking solvent. The DSC test was performed on the SDT-Q600 instrument at a heating rate of  $10\text{ }^\circ\text{C min}^{-1}$  under a nitrogen flow of  $50\text{ mL min}^{-1}$  in a closed aluminum crucible. Detonation velocity and pressure were calculated using the K–J equations. Infrared (IR) spectra were recorded on a Perkin-Elmer Spectrum BX FT-IR equipped with an ATR unit at  $25\text{ }^\circ\text{C}$ , using KBr plates to prepare thin films. Elemental analyses were performed using the Vario Micro cube Elementar Analyzer. Impact and friction sensitivities were assessed with a standard BAM Fall Hammer and BAM Friction Tester, respectively. Densities were determined at  $25\text{ }^\circ\text{C}$  with a Micromeritics AccuPyc II 1340 gas pycnometer.

The data were collected with a Bruker three-circle platform diffractometer equipped with a SMART APEX II CCD detector. A Kryo-Flex low-temperature device was used to keep the crystals at a constant  $173(2)\text{ K}$  during the data collection. The data collection and the initial unit cell refinement were performed by using APEX2 (v2010.3-0). Data reduction was performed by using SAINT (v7.68A) and XPREP (v2008/2). Corrections were applied for Lorentz, polarization, and absorption effects by using SADABS (v2008/1). The structure was solved and refined with the aid of the programs in the SHELXTL-plus (v2008/4) system of programs. The full-matrix least-squares refinement on F2 included atomic coordinates and anisotropic thermal parameters for all non-H atoms. The H atoms were included in a riding model. The structure was solved by direct methods with SHELXS-97 and expanded by using the Fourier technique. The nonhydrogen atoms were refined anisotropically. The hydrogen atoms were located and refined.

## 2. The Experiment and Crystallographic Data

### Caution!

Some of the compounds involved in this experiment are dangerous, so it is necessary to strictly follow laboratory safety regulations during the experiment and to wear face shields and leather gloves as required.

Reagents were purchased from Aldrich and Acros Organics and are used as received.  $^1\text{H}$  and  $^{13}\text{C}$  spectra are recorded on a 300 MHz (Bruker AVANCE 300) NMR spectrometer operating at 300 and 75 MHz, respectively. The decomposition points are obtained on a differential scanning calorimeter at a heating rate of  $5^\circ\text{C min}^{-1}$ . IR spectra are recorded on a FT-IR spectrometer (Thermo Nicolet AVATAR 370) as thin films by

using KBr plates. Densities are determined at 25 °C by employing a Micromeritics AccuPyc II 1340 gas pycnometer. Elemental analyses were carried out by using a Vario Micro cube Elementar Analyser. Impact and friction sensitivity measurements are made by using a standard BAM Fall hammer and a BAM friction tester. Detonation velocity and detonation pressure data are calculated by K–J equations.

### Common synthesis of BPP.

2,4,5,6-tetrahydropyrrolo[3,4-c]pyrazole (0.22 g, 2.00 mmol) was dissolved in 2 mL of water, then ammonium perchlorate (0.23 g, 2.00 mmol) and 0.60 mL of perchloric acid (70%) solution were added. The reaction was carried out at 60 °C for 30 min, cooled to room temperature, filtered, and the filter residue was washed with ethanol three times, followed by vacuum drying to obtain a white solid. Yield: 0.79 g, 92.4%. <sup>1</sup>H NMR (300 MHz, DMSO-d<sub>6</sub>):  $\delta$  = 9.58 (s, 2H), 7.60 (s, 1H), 7.18 (s, 4H), 4.27 (t, 4H) ppm. <sup>13</sup>C NMR (75 MHz, DMSO-d<sub>6</sub>):  $\delta$  = 152.60, 123.66, 117.53, 44.49, 43.73 ppm. IR (KBr): 3236, 1573, 1479, 1421, 1251, 1029, 955, 927, 881, 665, 618, 467, 430 cm<sup>-1</sup>. Elemental analysis for C<sub>5</sub>H<sub>13</sub>Cl<sub>3</sub>N<sub>4</sub>O<sub>12</sub> (427.54): calcd. C 14.05, H 3.07, N 13.11 %, found: C 13.88, H 2.91, N 13.18 %

### X-ray Crystallography

The crystal of **BPP** were performed on a Bruker Smart Apex II diffractometer with graphite-monochromated Mo K $\alpha$  radiation ( $\lambda$ = 0.71073 Å), respectively. Integration and scaling of intensity data were accomplished using the SAINT program<sup>2</sup>. The structures were solved by intrinsic using SHELXT2014 and refinement was carried out by a full- matrix least-squares technique using SHELXT2014. The hydrogen atoms were refined isotropically, and the heavy atoms were refined anisotropically. N-H and O-H hydrogens were located from different electron density maps, and C-H hydrogens were placed in calculated positions and refined with a riding model. Data were corrected for the effects of absorption using SADABS4 Relevant crystal data and refinement results are summarized in **Table S1**.

**Table S1.** Crystal data and structure refinement for BPP

| Crystal           | BPP                                                                           |
|-------------------|-------------------------------------------------------------------------------|
| Empirical formula | C <sub>5</sub> H <sub>13</sub> Cl <sub>3</sub> N <sub>4</sub> O <sub>12</sub> |
| Formula weight    | 427.54                                                                        |
| CCDC              | 2536776                                                                       |
| Crystal system    | monoclinic                                                                    |
| Temperature/K     | 193K                                                                          |
| a/ Å              | 10.6789(3)                                                                    |
| b/ Å              | 16.0290(5)                                                                    |

|                                             |                                                                |
|---------------------------------------------|----------------------------------------------------------------|
| c/ Å                                        | 8.7377(3)                                                      |
| $\alpha$ / °                                | 90                                                             |
| $\beta$ / °                                 | 95.7440(10)                                                    |
| $\gamma$ / °                                | 90                                                             |
| Volume/Å <sup>3</sup>                       | 1488.14(8)                                                     |
| Formula Z                                   | 4                                                              |
| Density (g cm <sup>-3</sup> )               | 1.908                                                          |
| Space group                                 | <i>P2<sub>1</sub>/c</i>                                        |
| $\mu$ (mm <sup>-1</sup> )                   | 0.690                                                          |
| F (000)                                     | 872.0                                                          |
| Radiation                                   | MoK $\alpha$ ( $\lambda$ = 0.71073)                            |
| Crystal size (mm <sup>3</sup> )             | 0.15 × 0.12 × 0.1                                              |
| 2 $\Theta$ range for data collection/°      | 4.6 to 54.988                                                  |
| Index ranges                                | -13 ≤ h ≤ 13, -20 ≤ k ≤ 20, -11 ≤ l ≤ 11                       |
| Reflections collected                       | 37718                                                          |
| Independent reflections                     | 3401 [ $R_{\text{int}}$ = 0.0714, $R_{\text{sigma}}$ = 0.0286] |
| Data/restraints/parameters                  | 3401/6/228                                                     |
| Goodness-of-fit on F <sup>2</sup>           | 1.078                                                          |
| Final R indexes [ $I \geq 2\sigma(I)$ ]     | $R_1$ = 0.0341, $wR_2$ = 0.0912                                |
| Final R indexes [all data]                  | $R_1$ = 0.0416, $wR_2$ = 0.0964                                |
| Largest diff. peak/hole / e Å <sup>-3</sup> | 0.41/-0.50                                                     |

**Table S2.** Bond distance of BPP

| Parameter | Å          | Parameter | Å        |
|-----------|------------|-----------|----------|
| C11-O1    | 1.4293(18) | N2-H2A    | 0.91     |
| C11-O2    | 1.4350(16) | N2-H2B    | 0.91     |
| C11-O3    | 1.4529(15) | N3-H3     | 0.88     |
| C11-O4    | 1.4419(16) | N4-H4     | 0.88     |
| C12-O6    | 1.4496(16) | N1-H1A    | 0.87     |
| C12-O7    | 1.4359(18) | N1-H1C    | 0.85(4)  |
| C12-O5    | 1.4381(17) | N1-H1B    | 0.87     |
| C12-O8    | 1.4279(17) | N1-H1D    | 0.86(4)  |
| C13-O9    | 1.4086(19) | C1-C2     | 1.365(3) |
| C13-O10   | 1.4369(17) | C2-C4     | 1.370(3) |
| C13-O12   | 1.4444(18) | C2-C3     | 1.487(3) |

|         |            |        |          |
|---------|------------|--------|----------|
| C13-O11 | 1.4367(18) | C4-C5  | 1.476(3) |
| N2-C5   | 1.519(3)   | C1-H1  | 0.95     |
| N2-C3   | 1.526(2)   | C3-H3A | 0.99     |
| N3-N4   | 1.347(2)   | C3-H3B | 0.99     |
| N3-C4   | 1.335(3)   | C5-H5A | 0.99     |
| N4-C1   | 1.343(3)   | C5-H5B | 0.99     |

**Table S3.** Bond angle of **BPP**

| Parameter   | °          | Parameter  | °          |
|-------------|------------|------------|------------|
| O3-C11-O4   | 108.77(9)  | N3-N4-H4   | 125        |
| O1-C11-O4   | 109.65(10) | C1-N4-H4   | 125        |
| O1-C11-O2   | 110.79(10) | H1A-N1-H1D | 104        |
| O1-C11-O3   | 109.16(10) | H1B-N1-H1C | 114        |
| O2-C11-O3   | 108.44(9)  | H1C-N1-H1D | 115(4)     |
| O2-C11-O4   | 109.99(9)  | H1A-N1-H1B | 105        |
| O5-C12-O6   | 108.17(10) | H1B-N1-H1D | 111        |
| O5-C12-O8   | 109.81(10) | H1A-N1-H1C | 107        |
| O6-C12-O7   | 108.80(10) | N4-C1-C2   | 106.71(16) |
| O5-C12-O7   | 109.04(10) | C3-C2-C4   | 112.19(16) |
| O7-C12-O8   | 110.72(10) | C1-C2-C4   | 107.08(17) |
| O6-C12-O8   | 110.25(10) | C1-C2-C3   | 140.73(17) |
| O9-C13-O12  | 110.93(13) | N2-C3-C2   | 100.96(15) |
| O9-C13-O11  | 110.64(12) | C2-C4-C5   | 113.87(17) |
| O9-C13-O10  | 110.88(12) | N3-C4-C2   | 109.09(16) |
| O10-C13-O12 | 108.33(11) | N3-C4-C5   | 137.03(18) |
| O11-C13-O12 | 107.05(11) | N2-C5-C4   | 100.68(14) |
| O10-C13-O11 | 108.89(11) | N4-C1-H1   | 127        |
| C3-N2-C5    | 112.29(15) | C2-C1-H1   | 127        |
| N4-N3-C4    | 106.83(17) | N2-C3-H3A  | 112        |
| N3-N4-C1    | 110.29(17) | C2-C3-H3B  | 112        |
| C3-N2-H2A   | 109        | H3A-C3-H3B | 109        |
| C3-N2-H2B   | 109        | C2-C3-H3A  | 112        |
| C5-N2-H2A   | 109        | N2-C3-H3B  | 112        |
| C5-N2-H2B   | 109        | N2-C5-H5B  | 112        |
| H2A-N2-H2B  | 108        | N2-C5-H5A  | 112        |
| C4-N3-H3    | 127        | H5A-C5-H5B | 109        |

|           |     |           |     |
|-----------|-----|-----------|-----|
| N4-N3-H3  | 127 | C4-C5-H5A | 112 |
| C4-C5-H5B | 112 |           |     |

**Table S4.** Torsion angle of **BPP**

| Parameter   | °         | Parameter   | °          |
|-------------|-----------|-------------|------------|
| C5-N2-C3-C2 | -0.3(2)   | C1-C2-C3-N2 | -179.5(3)  |
| C3-N2-C5-C4 | -0.2(2)   | C4-C2-C3-N2 | 0.7(2)     |
| C4-N3-N4-C1 | -0.1(2)   | C1-C2-C4-N3 | -0.2(2)    |
| N4-N3-C4-C2 | 0.2(2)    | C1-C2-C4-C5 | 179.22(18) |
| N4-N3-C4-C5 | -179.0(2) | C3-C2-C4-N3 | 179.71(17) |
| N3-N4-C1-C2 | 0.0(2)    | C3-C2-C4-C5 | -0.9(2)    |
| N4-C1-C2-C3 | -179.7(2) | N3-C4-C5-N2 | 179.8(2)   |
| N4-C1-C2-C4 | 0.1(2)    | C2-C4-C5-N2 | 0.7(2)     |

**Table S5.** Hydrogen bonds of **BPP**

| D-H...A      | d(D-H)/ Å | d(H...A)/ Å | d(D...A)/ Å | ∠(DHA)/ ° |
|--------------|-----------|-------------|-------------|-----------|
| N1-H1A...O3  | 0.87      | 2.15        | 2.913(2)    | 147       |
| N1-H1A...O12 | 0.87      | 2.56        | 3.139(3)    | 125       |
| N1-H1B...O4  | 0.87      | 2.6         | 3.248(2)    | 132       |
| N1-H1B...O5  | 0.87      | 2.19        | 2.974(2)    | 150       |
| N1-H1C...O3  | 0.85(4)   | 2.16(4)     | 2.991(2)    | 166(4)    |
| N1-H1D...O7  | 0.86(4)   | 2.16(4)     | 2.982(3)    | 160(4)    |
| N2-H2A...O4  | 0.91      | 2.24        | 3.081(2)    | 153       |
| N2-H2B...O4  | 0.91      | 2.32        | 3.024(2)    | 134       |
| N2-H2B...O5  | 0.91      | 2.25        | 2.941(2)    | 132       |
| N2-H2B...O6  | 0.91      | 2.53        | 3.114(2)    | 123       |
| N3-H3...O3   | 0.88      | 2.47        | 2.987(2)    | 118       |
| N3-H3...O10  | 0.88      | 2.3         | 3.010(2)    | 138       |
| N3-H3...O12  | 0.88      | 2.51        | 3.171(3)    | 133       |
| N4-H4...O12  | 0.88      | 2.11        | 2.929(3)    | 155       |
| N4-H4...O10  | 0.88      | 2.55        | 3.009(3)    | 113       |
| C1-H1...O1   | 0.95      | 2.24        | 3.131(3)    | 155       |
| C3-H3A...O2  | 0.99      | 2.51        | 3.320(3)    | 139       |
| C3-H3A...O7  | 0.99      | 2.55        | 3.248(3)    | 128       |

|              |      |      |          |     |
|--------------|------|------|----------|-----|
| C3-H3B···O2  | 0.99 | 2.6  | 3.174(2) | 117 |
| C3-H3B···O11 | 0.99 | 2.46 | 3.192(3) | 130 |
| C5-H5A···O9  | 0.99 | 2.55 | 3.398(3) | 144 |
| C5-H5A···O1  | 0.99 | 2.42 | 3.205(3) | 135 |

### 3. Theoretical Study

#### Detonation parameters estimated by using DFT calculation and extended K–J equation

For **BPP**, their detonation products can be described as  $N_2$  (g),  $H_2O$  (g),  $CO_2$  (g), and C (s). Accordingly, the complete detonation reactions are assumed:

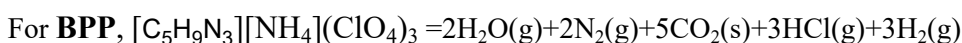

Based on these reactions, the detonation energy ( $\Delta E_{det}$ ) was calculated by DFT method with the code DMoL3 [2] under 3D periodic boundary conditions. The Monkhorst–Pack multiple K-point sampling of the Brillouin zone [3] and the Perdew–Becke–Ezerhoff (PBE) exchange–correlation function were employed in calculation. [4] The results are listed in Table S6. Then the obtained  $\Delta E_{det}$  was used to estimate the detonation heat ( $\Delta H_{det}$ ; kcal·g<sup>-1</sup>) from an empirical linear correlation equation [2]:

$$\Delta H_{det} = 1.127\Delta E_{det} + 0.046, r = 0.968 \quad (1)$$

where, r represents linear coefficient.

**Table S6 Calculated (DMoL3/PBE) total energy (hartree) used in the detonation reactions.**

| Compound               | <b>BPP</b> | $CO_2$   | $N_2$    | HCl |
|------------------------|------------|----------|----------|-----|
| Total energy (hartree) | -2698.547  | -188.479 | -109.449 |     |
| Compound               | C          | $H_2O$   | $H_2$    |     |
| Total energy (hartree) | -38.084    | -76.379  | -1.164   |     |

1 hartree = 2626.66 kJ·mol<sup>-1</sup>

We estimated the  $\Delta_f H$  for **BPP** from  $\Delta H_{det}$  based on the above assumed detonation reactions and Hess law [1]. The enthalpies of detonation reaction ( $\Delta_c H$ ) were calculated according to the formula:

$$\Delta_c H = \Delta H_{det} + \Delta nRT, (\Delta n = n (\text{gaseous products}) - n (\text{gaseous reactants})) \quad (5)$$

where,  $R = 8.314 \text{ J}\cdot\text{mol}^{-1}\cdot\text{K}^{-1}$  and  $T = 298.15 \text{ K}$ . Based on the calculated  $\Delta_c H$  and the known  $\Delta_f H$  of the products, the  $\Delta_f H$  can be calculated from the relevant detonation reactions for molecular perovskite compounds, and the results are listed in Table S7.

**Table S7 The enthalpies of formation of compounds, well-known explosives, and the relevant combustion products.**

| Compound | $\Delta H_{det}$ (kJ·mol <sup>-1</sup> ) | $\Delta_c H$ (kJ·mol <sup>-1</sup> ) | $\Delta_f H$ (kJ·mol <sup>-1</sup> ) |
|----------|------------------------------------------|--------------------------------------|--------------------------------------|
|----------|------------------------------------------|--------------------------------------|--------------------------------------|

|                      |          |          |                       |
|----------------------|----------|----------|-----------------------|
| RDX                  | -1241.63 | -1223.04 | -92.70                |
| HMX                  | -1652.55 | -1627.76 | -126.57               |
| <b>BPP</b>           | -2609.33 | -2572.15 | -155.98               |
| CO <sub>2</sub> (g)  | —        | —        | -393.51 <sup>a</sup>  |
| H <sub>2</sub> O (g) | —        | —        | -241.826 <sup>a</sup> |
| N <sub>2</sub> (g)   | —        | —        | 0 <sup>a</sup>        |
| HCl (g)              | —        | —        | -92.31 <sup>a</sup>   |
| O <sub>2</sub> (g)   | —        | —        | 0 <sup>a</sup>        |
| H <sub>2</sub> (g)   | —        | —        | -285.831 <sup>a</sup> |

<sup>a</sup> The  $\Delta_f H$  of the products were derived from National Institute of Standards and Technology (NIST).

After that, the following extended K–J equations were used to calculate the  $D$  (km·s<sup>-1</sup>) and  $P$  (GPa) [2]:

$$D = 1.01\Phi^{1/2}(1 + 1.30\rho) \quad (2)$$

$$P = 1.558\Phi\rho^2 \quad (3)$$

$$\Phi = 31.68N(M\Delta H_{\text{det}})^{1/2} \quad (4)$$

where,  $\rho$  represents the density of explosive (g·cm<sup>-3</sup>),  $N$  is the moles of detonation gases per gram of explosive,  $M$  is the average molecular weight of these gases, and  $\Phi$  is intermediate parameters.

## 4. References

- [1] Wang, Y.; Zhang, J.; Su, H.; Li, S.; Zhang, S.; Pang, S. A simple method for the prediction of the detonation performances of metal-containing explosives. *J. Phys. Chem. A* **2014**, 118, 4575-4581.
- [2] Delley, B. An all-electron numerical method for solving the local density functional for polyatomic molecules. *J. Chem. Phys.* **1990**, 92, 508-517.
- [3] Monkhorst, H. J.; Pack, J. D. Special points for brillouin-zone integrations. *Phys. Rev. B* **1976**, 13, 5188-5192.
- [4] Perdew, J. P.; Burke, K.; Ernzerhof, M. Generalized gradient approximation made simple. *Phys. Rev. Lett.* **1996**, 77, 3865-3868.

## 5. <sup>1</sup>H NMR and <sup>13</sup>C NMR Spectra of BPP

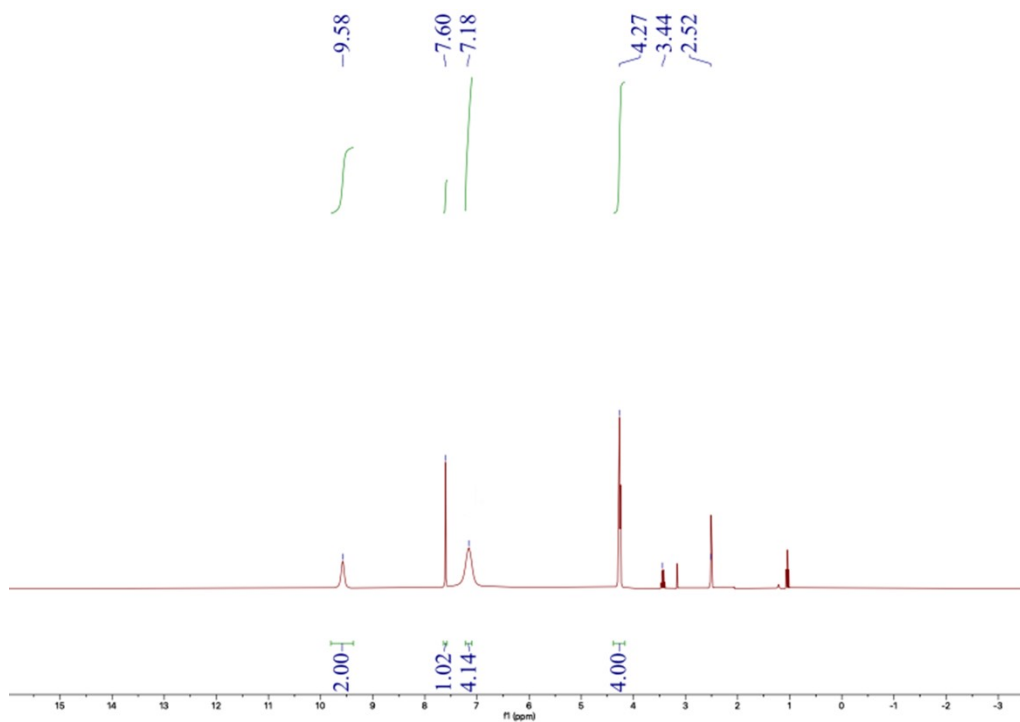

**Figure S1**  $^1\text{H}$  NMR spectra (300 MHz) of **BPP** in  $[\text{D}_6]$  DMSO at 25 °C

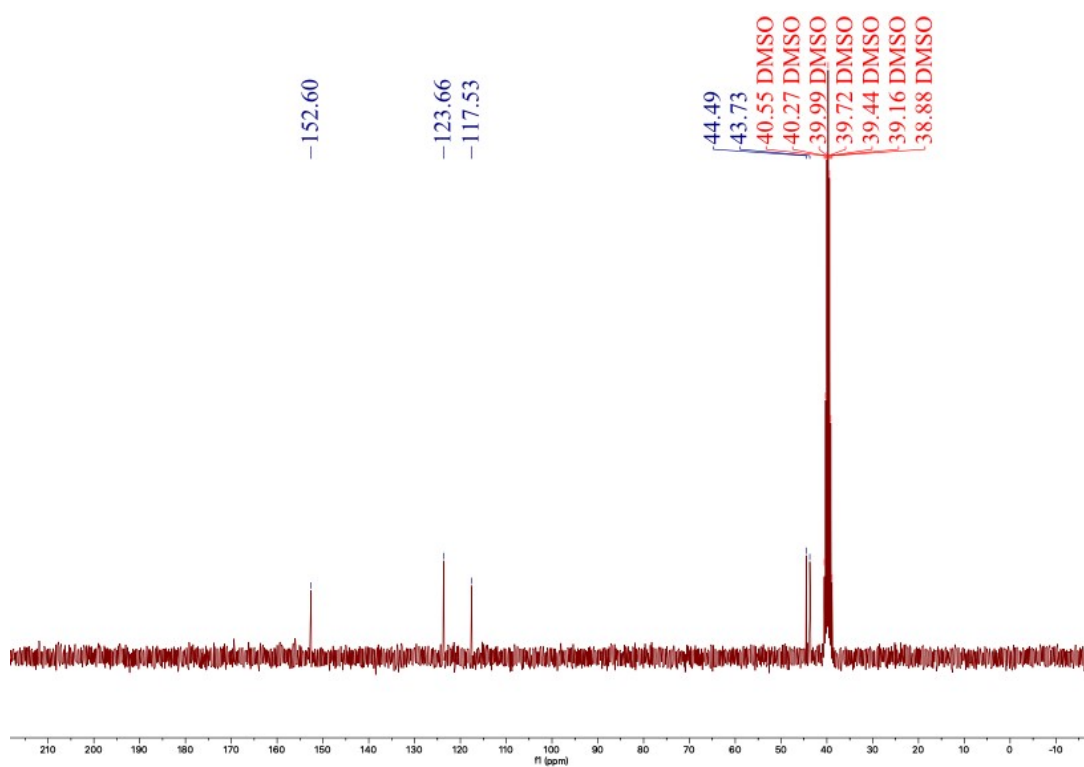

**Figure S2**  $^{13}\text{C}$  NMR spectra (75 MHz) of **BPP** in  $[\text{D}_6]$  DMSO at 25 °C

## 6. The IR Spectras of BPP

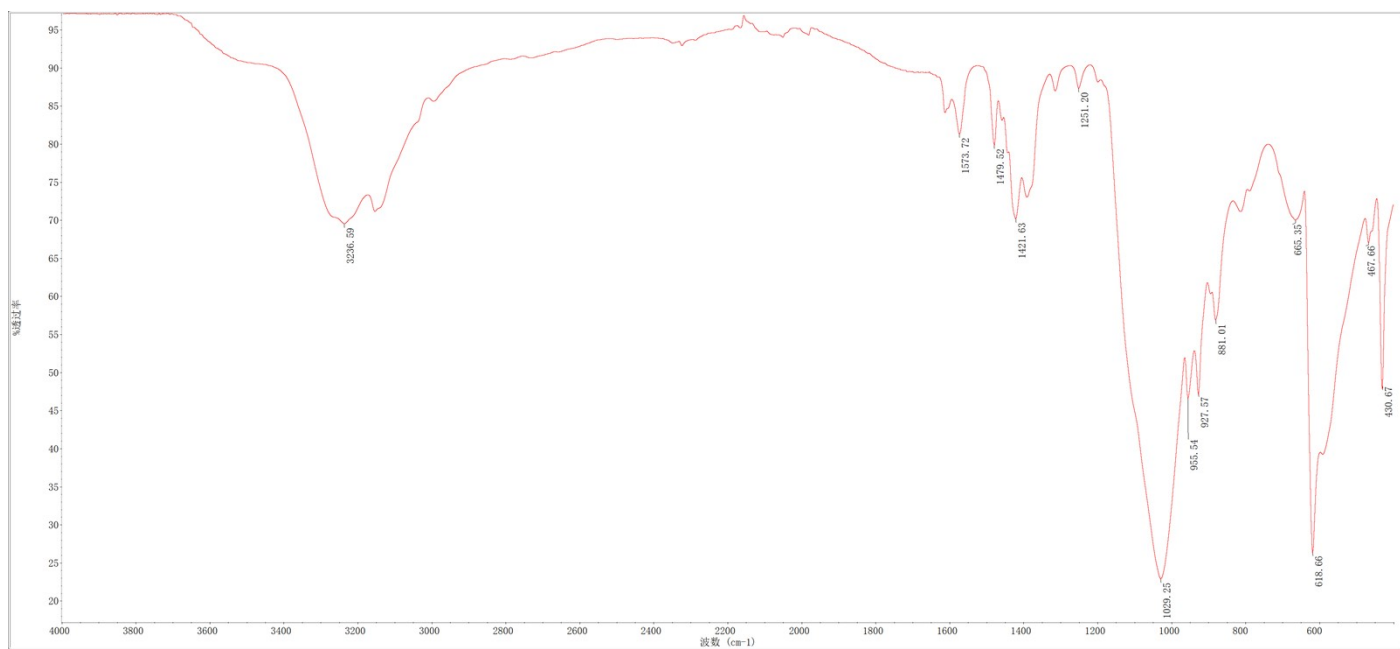

Figure S3 The IR spectra of BPP.

## 7. The DSC of BPP

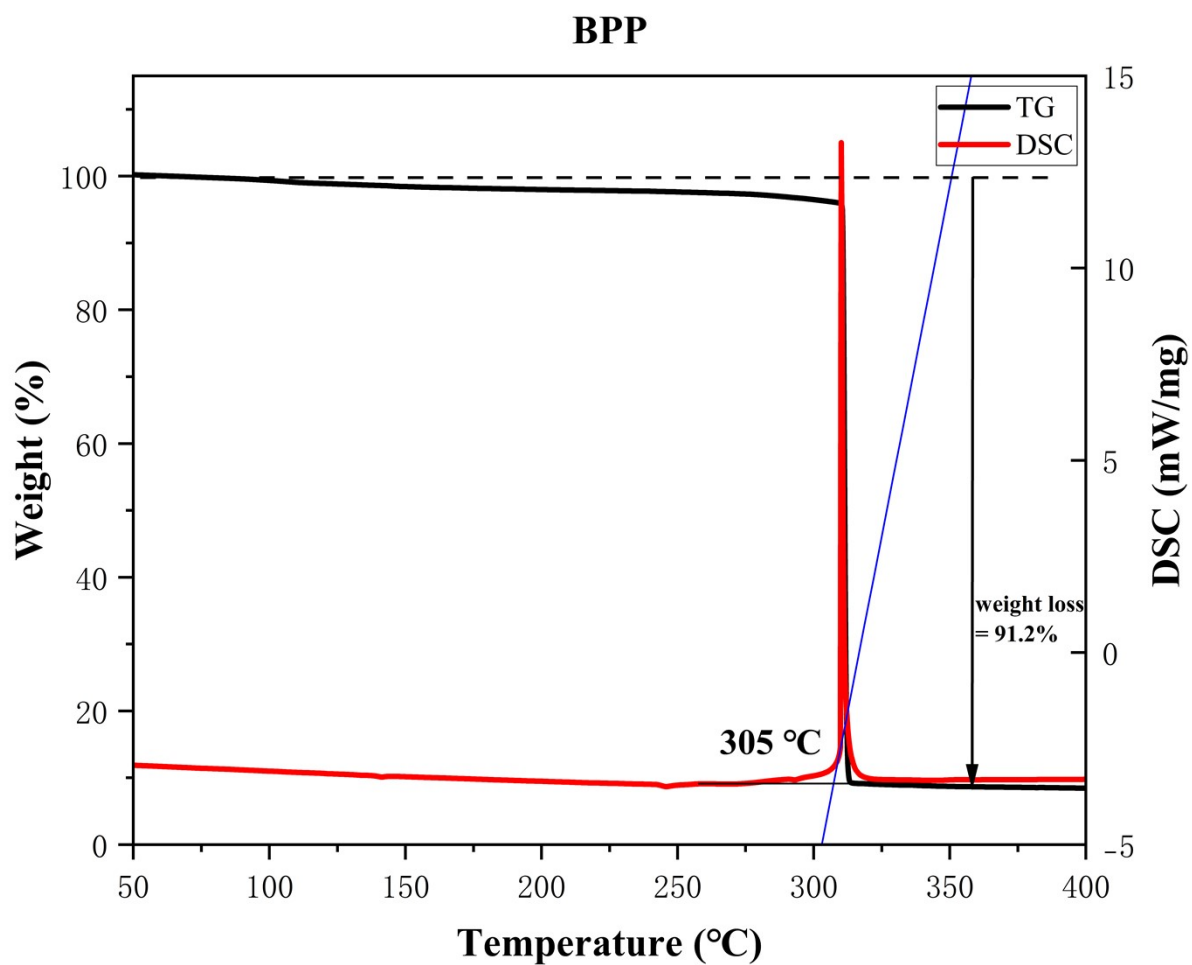

Figure S4 The DSC of BPP.
